# Supplementary material for: An Incomplete TCA Cycle Increases Survival of Salmonella Typhimurium during Infection of Resting and Activated Murine Macrophages
Source: PubMed Central journal article supplement (PMC2975626; doi:10.1371/journal.pone.0013871), 2010-11-08
Supplement: pone.0013871.s001.pdf [file pone.0013871.s001.pdf]

**Table S1.** Strains and plasmids used in this study.

| <b>S. Typhimurium strains</b> | <b>Relevant genotype</b>             | <b>Method of construction</b>                                                                                                    | <b>Reference</b> |
|-------------------------------|--------------------------------------|----------------------------------------------------------------------------------------------------------------------------------|------------------|
| 4/74                          | Wild-type strain                     | N/A                                                                                                                              | [22]             |
| AT3385                        | 4/74 $\Delta aceA::Cm$               | $\lambda$ Red mutagenesis*: pKD3 PCR product using primers aceAredf and aceAredr                                                 | This study       |
| AT3448                        | 4/74 $\Delta sucAB::Kn$              | $\lambda$ Red mutagenesis*: pKD4 PCR product using primers sucAredf and sucBredr                                                 | <i>ibid</i>      |
| AT3449                        | 4/74 $\Delta sucCD::Kn$              | $\lambda$ Red mutagenesis*: pKD4 PCR product using primers sucCredf and sucDredr                                                 | <i>ibid</i>      |
| AT3462                        | 4/74 $\Delta sdhCDAB::Kn$            | $\lambda$ Red mutagenesis*: pKD4 PCR product using primers sdhCredf and sdhBredr                                                 | <i>ibid</i>      |
| AT3469                        | 4/74 $\Delta aceA$                   | Transformed JH3385 with pCP20 to excise the Cm <sup>R</sup> cassette from the chromosome. The plasmid was cured from the strain. | <i>ibid</i>      |
| AT3496                        | 4/74 $\Delta sucCD::Kn, \Delta aceA$ | P22 transduced $\Delta sucCD::Kn$ from JH3449 into JH3469                                                                        | <i>ibid</i>      |
| AT3472                        | 4/74 $\Delta sucAB$                  | Transformed JH3448 with pCP20 to excise the Kn <sup>R</sup> cassette from the chromosome. The plasmid was cured from the strain. | <i>ibid</i>      |

|        |                                |                                                                                                                                  |             |
|--------|--------------------------------|----------------------------------------------------------------------------------------------------------------------------------|-------------|
| AT3475 | 4/74 $\Delta$ <i>sdhCDAB</i>   | Transformed JH3462 with pCP20 to excise the Kn <sup>R</sup> cassette from the chromosome. The plasmid was cured from the strain. | <i>ibid</i> |
| AT3477 | 4/74 $\Delta$ <i>sucCD</i>     | Transformed JH3449 with pCP20 to excise the Kn <sup>R</sup> cassette from the chromosome. The plasmid was cured from the strain. | <i>ibid</i> |
| AT3505 | 4/74 $\Delta$ <i>gltA::</i> Kn | $\lambda$ Red mutagenesis*: pKD4 PCR product using primers <i>gltAredf</i> and <i>gltAredr</i>                                   | <i>ibid</i> |
| AT3508 | 4/74 $\Delta$ <i>mdh::</i> Kn  | $\lambda$ Red mutagenesis*: pKD4 PCR product using primers <i>mdhredf</i> and <i>mdhredr</i>                                     | <i>ibid</i> |

### Plasmids

|                       |                                                                                              |                                                                              |             |
|-----------------------|----------------------------------------------------------------------------------------------|------------------------------------------------------------------------------|-------------|
| pKD46                 | $\lambda$ Red recombinase expression plasmid                                                 | N/A                                                                          | [23]        |
| pKD3                  | Cm <sup>R</sup> resistance cassette-containing plasmid                                       | N/A                                                                          | <i>ibid</i> |
| pKD4                  | Kn <sup>R</sup> resistance cassette-containing plasmid                                       | N/A                                                                          | <i>ibid</i> |
| pCP20                 | FLP-recombinase expression plasmid                                                           | N/A                                                                          | <i>ibid</i> |
| pWKS30                | Ap <sup>R</sup> low-copy-number vector,<br>pSC101 origin of replication                      | N/A                                                                          | [25]        |
| pWKS30:: <i>sucCD</i> | Ap <sup>R</sup> low-copy-number vector, pSC101 origin of replication, expresses <i>sucCD</i> | 2,056 bp <i>sucF-sucR</i> PCR product cloned into pWKS30 BamHI-HindIII sites | This study  |

\*The  $\lambda$ Red mutagenesis method is described in Materials and Methods
